# Supplementary material for: Genetic architecture of main effect QTL for heading date in European winter wheat
Source: Front Plant Sci. 2014 May 20;5:217. doi: 10.3389/fpls.2014.00217 (PMC4033046; doi:10.3389/fpls.2014.00217)
Supplement: Supplementary file 1 [file DataSheet1.XLSX]

## Sheet: Table_S1
Supplemental Table S1: List of varieties, genotyping data of candidate genes and phenotypic data.
Variety name	GW no.	habit	Ppd-D1 wildtype	Ppd-D1a mutant	Vrn-B1		Vrn-D1		09.AND.HD	09.SEL.HD	09.WOH.HD	10.AND.HD	10.JAN.HD	10.SAU.HD	10.SEL.HD	10.WOH.HD	BLUES
			day length sensitive	day length neutral	dominant	recessive	dominant	recessive	48.8°N 1.8°E height= 120.8m	50.0°N 8.9°E height= 113.4m	54.4°N 9.2°E height= 11.6m	48.8°N 1.8°E height= 120.8m	48.2°N 1.8°E height = 135.0m	50.3°N 3.5°E height= 72.5m	50.0°N 8.9°E height= 113.4m	54.4°N 9.2°E height= 11.6m
P06079	GW0379	spring		1		1		1	134.5	143	135.1	139.4	142.1	144.2	150	151.5	142.5
CCB Ingénio	GW0203	winter		1		1		1	136.8	143	136.5	141.1	142.6	144.6	151.6	150.5	143.3
P05311	GW0377	spring		1		1	1		136.3	143	135.9	141	142.4	145.1	150.5	154	143.5
Trocadero	GW0201	winter		1		1		1	136.7	143	135.7	141	142.4	145.2	152	152.5	143.6
Recital	GW0215	winter		1		1		1	137.8	144	135.5	140.7	142.2	144.4	150.5	153.4	143.6
H03309	GW0212	winter		1		1		1	138.6	143.5	136.8	141.9	143.5	144.6	152.1	153.6	144.3
exotic	GW0145	winter		1		1		1	138.9	144	136.4	142.5	144.2	145.2	153	152.9	144.6
P05312	GW0378	spring		1		1	1		136.1	145	136.1	141.3	144.7	145	152	156.4	144.6
Exotic	GW0105	winter		1		1		1	139.1	144.5	136.6	142.5	143.6	145.9	152.5	153.1	144.7
Garcia	GW0148	winter		1		1		1	138.1	144.5	138.1	142.8	143.3	146.1	153	153.5	144.9
KWS Scirocco LP 509.3.04	GW0369	spring	1			1		1	141.1	143.5	136.9	143	144.5	146.6	151	153.2	145
Catalan	GW0133	winter	1			1		1	139.6	142.5	137.1	142.3	144.4	146.7	151.5	156.6	145.1
Azimut	GW0121	winter		1		1		1	140.3	146	138	142.5	142.6	146.2	152	154	145.2
Lona	GW0163	winter	1		1			1	140.1	145	137.6	142.7	144.3	145.2	152	155	145.2
Acienda	GW0109	winter		1		1		1	140.1	145	138.1	142.7	143	146.1	152.6	155	145.3
Taifun	GW0367	spring	1			1		1	141	143.5	138.2	143.8	144.7	146.8	151	153.9	145.4
Aubusson	GW0118	winter	1			1		1	139.5	144	137.4	142.4	144.5	146.5	155	155.5	145.6
H05606	GW0375	spring		1		1		1	140.4	144	138.4	142.6	143.7	146.1	155	155.5	145.7
Craklin	GW0137	winter		1		1		1	141.1	144.5	138.7	143.1	143.4	146.2	153.5	156	145.8
Soissons	GW0327	winter		1		1		1	140.7	144.5	137.9	143.3	144.8	145.9	152.5	156.9	145.8
Autan	GW0119	winter		1		1		1	139.3	144.5	138.4	143.5	145.3	146.8	153.5	155.9	145.9
Epidoc	GW0141	winter		1		1		1	140.9	145.5	138	142.2	145.8	145.7	153	156.4	145.9
Royssac	GW0188	winter		1		1		1	140	146	138.5	142.6	143.6	146.2	155	155.5	145.9
Bueno	GW0208	winter		1		1		1	139.5	145	137.9	142.7	145.1	146.3	154	156.9	145.9
Aguila	GW0110	winter		1		1		1	140	145	138.5	142.7	144.2	146.5	155	156.9	146.1
Cezanne	GW0134	winter		1		1		1	140.2	145	138.5	142.8	144.7	147	155.5	155.4	146.1
KWS Chamsin LP 779.2.04	GW0370	spring	1			1		1	144.6	145	137.3	143.7	145.5	147	152.5	153.5	146.1
Baguette 11	GW0376	spring		1		1		1	140	144	138.1	142.3	144.2	145.3	156.1	158.5	146.1
Orpic	GW0174	winter		1		1		1	141.6	145	138.3	142.6	144.4	145.7	154	157.7	146.2
PR22R58	GW0216	winter		1		1		1	142	146	138.9	142	143.8	146.2	155	156	146.2
Octet	GW0171	winter		1		1		1	141.4	145	139	143.7	144.9	146.8	153.5	156.5	146.3
Euclide	GW0219	winter		1		1		1	140.6	145	139.8	144.3	145.3	145.5	154	156.5	146.4
Andalou	GW0106	winter		1		1		1	140.4	146	139	142.6	144	147	155	158.2	146.5
Graindor	GW0149	winter		1		1		1	142.1	145	139.5	142.8	144.7	146.6	154	157	146.5
Innov	GW0213	winter		1		1		1	141.6	145.5	139.1	142.9	144.6	147.1	155	156.4	146.5
Altigo	GW0221	winter	1			1		1	143.1	145	139	143.8	145.5	146.9	153.6	154.8	146.5
Monsun	GW0366	spring	1		1			1	142.8	144.5	138.9	143.7	146.5	147.1	152.5	155.6	146.5
Isengrain	GW0160	winter		1		1		1	141.5	145	139	143.1	146.2	146.6	154.5	157	146.6
Element	GW0248	winter	1			1		1	142.9	145.5	140	143.4	145.4	146.9	154	154.5	146.6
Ramiro	GW0352	winter	1			1		1	144.2	143	139.4	144.1	146	148	152.9	155.5	146.6
Bastide	GW0126	winter	1			1		1	140.9	145	138.4	143	145.4	147.1	155.6	158.1	146.7
H03311	GW0211	winter		1		1		1	141.7	145.5	140.5	142.8	144.6	147.4	153.5	157.9	146.7
Apache	GW0256	winter		1		1		1	143	146	140.6	143.7	145.2	142.8	154.4	158	146.7
Mercato	GW0168	winter		1		1		1	142.1	144.5	140.9	142.3	145.7	147.4	155	157.6	146.9
Mendel	GW0167	winter	1			1		1	142	146	139.8	143.4	146.5	146.6	155.5	155.9	147
Richepain	GW0186	winter	1			1		1	142	146	140	143.9	146.6	147.5	155.1	155.1	147
Inoui	GW0156	winter		1		1		1	140.8	146	139.9	142.7	145.2	147.2	156.5	158.5	147.1
Bryza	GW0374	spring	1			1		1	143.9	146	139.1	144.5	146.4	148.7	152	157	147.2
Ornicar	GW0173	winter	1			1		1	142.4	146	140	144.5	146	147.9	155	157.1	147.4
Instinct	GW0157	winter	1			1		1	142.9	145.5	139.9	144.9	145.9	147.1	155.5	158	147.5
Aldric	GW0220	winter		1		1		1	143	146	139.8	143.7	145.8	147.8	156	158.5	147.6
KWS Aurum LP 819.4.04	GW0371	spring	1			1		1	144.6	146	140	145.2	145.7	148.2	152.9	158	147.6
Arobase	GW0115	winter	1			1		1	143.3	146	142.5	144.8	145.8	143.8	156	159	147.7
Maxyl	GW0166	winter		1		1		1	142	147	140.2	142.8	146.1	147	156	160.1	147.7
Bagou	GW0222	winter	1			1		1	142.2	146	140.7	143.8	145.9	147.8	156.5	158.5	147.7
Kontrast	GW0045	winter	1			1		1	145.3	146	140.1	144.5	146.4	148.7	154	157.6	147.8
Campero	GW0130	winter	1			1		1	143.3	145.5	140.5	144.3	145.9	148.1	156	158.5	147.8
Tapidor	GW0198	winter	1			1		1	142.4	146	139.6	144.6	146.4	147.4	156	160	147.8
Vanek	GW0372	spring	1		1			1	146.6	146.5	139	144.8	145.6	148.5	154	157.5	147.8
Inédit	GW0204	winter	1			1		1	144.8	145.5	140.3	144.6	146.8	146.8	156	158.4	147.9
Premio	GW0217	winter		1		1		1	144.3	146	140.1	144.5	145.9	148.6	155.5	158.4	147.9
Quatuor	GW0184	winter		1		1		1	144.3	146.5	141.2	143.6	146	147.4	156	158.8	148
CCB Préférence	GW0205	winter		1		1		1	142.7	146	142.6	144.2	145.8	148	156	159	148
Rubens	GW0283	winter	1			1		1	144.7	145	141.4	145.8	145.9	148.9	154	158.6	148
Equilibre	GW0142	winter	1			1		1	144.1	146.5	140	143.1	146.5	148.3	157	159.5	148.1
Sisley	GW0195	winter	1			1		1	143.8	147	140	144.7	146.5	148.6	156	158	148.1
Oratorio	GW0214	winter		1		1		1	144.1	146.5	140.1	144.5	145	149.2	155.6	159.6	148.1
Xenos	GW0255	winter	1			1		1	146.6	146	139.6	145.4	146.3	149.6	154	157	148.1
Eveil	GW0144	winter	1			1		1	143.9	146	141.6	144.1	145.5	148.6	156.4	159.6	148.2
Banquet	GW0258	winter		1		1		1	145.6	146	141.9	143.1	146.7	149.2	155	158.5	148.2
Arack	GW0114	winter	1			1		1	144.5	147.5	140.5	144.5	146.3	149	155.6	158.6	148.3
Levis	GW0162	winter	1			1		1	144.2	147.5	140.5	144	146.2	148.6	156	159.4	148.3
Nadobna	GW0277	winter	1			1		1	145.5	145.5	142.6	145.6	146.9	148.5	153.9	158	148.3
Smuga	GW0285	winter	1			1		1	146.2	146	141	144.6	146.8	148.7	154.5	158.6	148.3
Calisto	GW0129	winter		1		1		1	143.5	147	142.9	144.2	145.9	148.9	155	160	148.4
Semafor	GW0193	winter		1		1		1	144.8	147.5	140	144.7	146	147.9	157	159	148.4
Satyna	GW0284	winter		1		1		1	145.5	146.5	141.9	144.1	146	149.6	155	159.5	148.5
Allister	GW0113	winter	1			1		1	143.5	148	141.4	144.3	147	149.1	155.5	159.6	148.6
Marcheval	GW0165	winter	1			1		1	145.1	146.5	141.3	144.5	149.7	147.6	157	158.9	148.8
Caphorn	GW0131	winter		1		1		1	145.2	147	141.5	144.4	145.8	150	157.5	159.5	148.9
Hamac	GW0151	winter	1			1		1	145.3	147	142.6	144	146.5	149.1	157	160.1	148.9
Runal	GW0189	winter	1			1		1	145.5	147.5	142.7	143.2	147.5	150	156	158.6	148.9
Sankara	GW0191	winter	1			1		1	145.2	147	142.5	146	145.9	149.8	156.4	159.1	149
Fridolin	GW0251	winter	1			1		1	146.6	146	141	146.2	147.3	150.1	155	159.6	149
Renan	GW0354	winter	1			1		1	144.3	150	142.4	144.8	147.5	149.1	156.1	158.5	149.1
Cardos	GW0019	winter	1			1		1	144.7	148.5	142	145.2	147.6	150.5	156	159.5	149.2
H05581A	GW0209	winter	1			1		1	146.3	148	141.9	144.9	146.7	150	156	159.9	149.2
Bogatka	GW0265	winter		1		1		1	145.4	147	142.1	145.1	148	150.4	156.5	158.9	149.2
Orvantis	GW0175	winter		1		1		1	146.2	147.5	143.3	144	145.6	150	157	160.6	149.3
Rainer	GW0253	winter	1			1		1	148.2	147.5	142.6	144.8	147.1	149.7	156	158.9	149.3
Kobra Plus	GW0271	winter		1		1		1	146.5	148.5	140.3	144.5	146.3	151.7	156.5	160	149.3
Paladain	GW0176	winter	1			1		1	145	147	142.4	145.5	146.9	150.4	157.5	160.5	149.4
Cordiale	GW0307	winter	1			1		1	146.5	148	142.4	145.5	146.9	150.3	155.5	160.5	149.4
Dinosor	GW0138	winter	1			1		1	145.3	147.5	142	146.9	147.7	150.7	156.5	159	149.5
Nirvana	GW0169	winter	1			1		1	146.6	148	143	145.3	146.5	149.8	156	160.9	149.5
Marin	GW0368	spring	1			1		1	146.5	147	141.9	145.9	147.7	150.5	154.5	162	149.5
H04438	GW0210	winter		1		1		1	144.9	149.5	141.4	146.1	146.8	150.3	157	160.5	149.6
Ambition	GW0226	winter	1			1		1	146.8	147	141.9	146.5	147.7	150.9	156	159.6	149.6
Alceste	GW0363	winter	1			1		1	147.7	149	142.6	145.5	147.3	149	155.6	159.9	149.6
Ludwig	GW0050	winter	1			1		1	147.5	146.5	142.9	146.1	147.7	151.2	156.5	159	149.7
Tiger	GW0104	winter	1			1		1	146.4	148.5	142.2	145.6	148	151.3	156.5	159	149.7
Caribou	GW0132	winter	1			1		1	147.3	147.5	142.2	145.6	147	150	157	161.1	149.7
Pytagor	GW0183	winter	1			1		1	145.7	148	142.5	147	146.8	150.2	157	160.5	149.7
Iridium	GW0224	winter	1			1		1	146.1	147.5	142	146.6	147.3	149.8	156	161.9	149.7
Capo	GW0247	winter	1			1		1	147	146.5	143	147.5	147.9	150.9	156	159	149.7
Quebon	GW0072	winter	1			1		1	147.3	147.5	143.1	146.1	147.2	150	156.5	161	149.8
Figura	GW0266	winter	1			1		1	147.5	147	142.8	146.2	147.3	151.8	156.5	159	149.8
Muza	GW0276	winter		1		1		1	147.9	148.5	142	146	147	150.2	156.5	160.1	149.8
Azzuro	GW0122	winter	1			1		1	147.7	148	142.4	146.5	147.3	151.5	156.5	159.4	149.9
Parador	GW0178	winter	1			1		1	145.8	148	142.6	146.4	146	152.7	157	160.6	149.9
Bermude	GW0218	winter	1			1		1	146.3	148.5	144.2	145.4	146.8	150.7	156.6	160.5	149.9
Naridana	GW0278	winter		1		1		1	146.1	149.5	143.4	145	147.1	151.1	157	160	149.9
Antonius	GW0245	winter	1			1		1	147.8	147	142.2	149.6	147.9	151.8	155	159.1	150
Batuta	GW0264	winter	1			1		1	146.7	147.5	143.4	146.9	148.1	150.7	156.5	160.5	150
Astuce	GW0116	winter	1			1		1	147.6	148.5	145	145.5	147	150.5	156.5	160	150.1
Intense	GW0159	winter	1			1		1	147.6	148	142.5	146.4	148	150.9	157.1	160.5	150.1
Astrado	GW0246	winter	1			1		1	148.3	147	142.8	148.8	147.7	151.4	155.5	159.5	150.1
Capnor	GW0018	winter	1			1		1	148.1	147	142.6	148.1	148.4	152.1	155.5	160	150.2
Mulan	GW0062	winter	1			1		1	146.8	148	143.5	148	148.3	150.8	156.5	160	150.2
Bagatelle 007	GW0123	winter	1			1		1	148.1	146.5	144.1	147.6	147.8	151.6	156	160	150.2
Charger	GW0136	winter	1			1		1	145.3	148.5	142.4	146.4	147.9	151.4	158.5	161	150.2
Boisseau	GW0223	winter	1			1		1	146.2	149	143.2	146.6	148.5	150.8	157.1	160.1	150.2
Macro	GW0164	winter	1			1		1	147.7	149	143.4	146.7	147.8	150	156.5	161.5	150.3
JB Asano	GW0384	winter	1			1		1	147.7	148	143	146.6	148.4	150.9	157	160.5	150.3
Asketis	GW0007	winter	1			1		1	148.2	149	142.9	145.8	148	152.6	156.5	160.5	150.4
Meunier	GW0058	winter	1			1		1	148.4	149.5	142.6	146	147.6	150.1	158	161	150.4
Globus	GW0252	winter	1			1		1	148.7	151.5	144.9	145.5	147.3	150	155.5	159.6	150.4
Izyda	GW0269	winter	1			1		1	148.8	147.5	144.2	145.9	148.3	151.8	157	160	150.4
Timber	GW0329	winter	1			1		1	148	147.5	143.8	146.1	147.2	151.6	157	162	150.4
Caesar	GW0339	winter	1			1		1	148.1	148	143.7	145.6	148.8	152.1	156	160.6	150.4
Toisondor	GW0200	winter		1		1		1	147.2	150	144	146.1	147.2	150.6	157	162.1	150.5
Mascot	GW0322	winter	1			1		1	148.4	147.5	142.4	147	147.6	150.5	158.5	162	150.5
Ibis	GW0346	winter	1			1		1	148	147	142.6	146.8	148	152.2	157	162.5	150.5
Sperber	GW0357	winter	1			1		1	146.6	148	143.5	146.2	148.9	151.4	157.5	162	150.5
Chagall	GW0135	winter	1			1		1	146.9	148.5	143.5	147.1	147.8	151.9	158	161	150.6
Tamaro	GW0197	winter	1			1		1	147.7	149	143.6	146.5	148	152.1	156.4	161.5	150.6
Markiza	GW0274	winter	1			1		1	148.4	148	143.6	147.6	147.9	151.6	157.5	160.5	150.6
Trappe	GW0373	spring	1		1			1	146.5	149	143.7	146.6	148.2	153	156	161.5	150.6
Avantage	GW0120	winter	1			1		1	146.7	149	145.6	146.9	147.9	152.8	156.5	160.6	150.7
Nuage	GW0170	winter	1			1		1	147.7	148.5	143.8	148.5	147.5	151.9	157	161	150.7
Einstein	GW0311	winter	1			1		1	145.9	149.5	143.5	146.3	147.6	151.3	158.4	162.9	150.7
Glasgow	GW0314	winter	1			1		1	148.3	148.5	144	146.4	147.2	152	156.5	162.5	150.7
Cubus	GW0026	winter	1			1		1	147	149	143.9	148.9	147.9	151.9	156.4	161.4	150.8
Folio	GW0146	winter	1			1		1	147.1	151	144.4	145.7	148.6	150.8	157.5	161	150.8
Koch	GW0044	winter	1			1		1	148.6	148	144.1	147.5	148.4	151.8	156.9	162	150.9
Arina	GW0338	winter	1			1		1	148.6	148.5	144.1	146.9	150.2	152.7	156.5	159.4	150.9
Boston	GW0127	winter	1			1		1	148	149	144	146.8	148.6	152.3	157.5	162	151
Pulsar	GW0182	winter	1			1		1	147.5	149	145.5	147.1	148.2	151.9	157.5	162.5	151.1
Intérêt	GW0206	winter	1			1		1	146.7	151.5	144.4	146	147.8	152.6	157.5	162.5	151.1
Mikon	GW0349	winter	1			1		1	149.6	150.5	144.1	147.1	147.6	151.5	157.5	160.5	151.1
Semper	GW0262	winter	1			1		1	148.5	149	144.4	147.6	149.3	153	156.5	161.4	151.2
Enorm	GW0032	winter	1			1		1	148.1	150.5	143.5	147.5	148.3	152.4	157	162.9	151.3
Tukan	GW0092	winter	1			1		1	149.1	150	143.6	147.6	148.7	152.3	157	162.4	151.3
Finezja	GW0267	winter	1			1		1	150.3	149	144.8	146.2	150.8	152.1	156.5	160.6	151.3
Buteo	GW0016	winter	1		1			1	149.4	148.5	143.4	148.8	150.6	152.1	157	161.4	151.4
Florett	GW0100	winter	1			1		1	148.1	151	144.6	148.6	148	153.2	157	161.1	151.4
Alcazar	GW0111	winter	1			1		1	148.7	150.5	144.9	147.5	149.1	151.2	158.1	161.5	151.4
PR 22 R 28	GW0180	winter	1			1		1	149.2	150	144.3	148.2	147.6	151.4	156.9	163.5	151.4
Expert	GW0207	winter	1			1		1	149.5	150.5	144.5	147.2	147.7	151.6	158	161.9	151.4
Rialto	GW0261	winter	1			1		1	148.7	150.5	144.5	147.6	147.6	152	157.5	163	151.4
Marksman	GW0321	winter	1			1		1	148	152	144.9	147.1	147.3	151.4	158	162.4	151.4
Incisif	GW0155	winter	1			1		1	149.9	151	144.5	147.5	147.7	151.7	158	162.1	151.5
Portland	GW0235	winter	1			1		1	147.7	150.5	145.1	146.3	151.4	152.8	157.4	161	151.5
Eriwan	GW0249	winter	1			1		1	151.7	148.5	142.3	149.9	150.1	152	155.6	162	151.5
Contra	GW0025	winter	1			1		1	147.9	149.5	144.4	149.4	149.1	152.7	158	161.4	151.6
Skater	GW0079	winter	1			1		1	148.9	150	144.4	148	149.6	152.5	157	162.3	151.6
SW Topper	GW0084	winter	1			1		1	149	148	143.9	149.5	150.1	153.2	157	162	151.6
Sogood	GW0196	winter	1			1		1	149.2	150	144.9	147.8	147.9	153.1	158	162	151.6
Titlis	GW0199	winter	1			1		1	147.8	148	144.7	149.7	149.3	152.5	157	163.6	151.6
Gladiator	GW0313	winter	1			1		1	148.4	152	145.1	148.1	148.1	151.4	158	162.1	151.6
Sophytra	GW0385	winter	1			1		1	150.8	152	144.5	146.6	149.3	152.4	157	160.5	151.6
Lindos	GW0102	winter	1			1		1	147.9	149.5	144.7	148.6	150.8	153.2	157.5	161.5	151.7
Balance	GW0124	winter	1			1		1	148.8	148	145.4	147.7	149.7	153.2	158.4	162.6	151.7
Tuscan	GW0242	winter	1			1		1	149.6	151	144.1	148.5	148	151.3	158.5	162.4	151.7
SW Gnejs	GW0296	winter	1			1		1	147.7	150	143.9	148	150.6	153.3	157.5	162.4	151.7
Ares	GW0337	winter	1			1		1	148.1	150	145.7	148.7	149	152.7	157	162	151.7
Cetus	GW0023	winter	1			1		1	148.9	150.5	144.4	148.9	150.7	152.4	157.1	161.6	151.8
Greif	GW0037	winter	1			1		1	148.7	150.5	144.9	148.4	149	152.7	157	163.5	151.8
Schamane	GW0076	winter	1			1		1	148.5	149.5	143.9	149.2	150.2	154.8	157.5	160.8	151.8
Forban	GW0147	winter	1			1		1	149.2	150	144.2	148.6	150.1	152.5	157.1	162.5	151.8
SW Harpun	GW0298	winter	1			1		1	149.2	148	145	149.8	149.1	153.5	157.5	162.5	151.8
Apollo	GW0336	winter	1			1		1	148.1	149	144.5	150.3	150.1	153.2	157.5	161.9	151.8
Impression	GW0041	winter	1			1		1	148.7	150.5	146.4	148.5	149.1	153.3	157	162	151.9
Humber	GW0316	winter	1			1		1	148.3	149	145.9	148.9	149	153.9	157.5	162.4	151.9
SW Tataros	GW0334	winter	1			1		1	148.6	150.5	143.9	149	149.6	154	156.9	162.6	151.9
Akratos	GW0002	winter	1			1		1	149.8	151	144	148.2	150.3	153.2	157.9	161.6	152
Winnetou	GW0095	winter	1			1		1	149	149.5	144.7	148.7	150.1	153.2	158	162.4	152
Ephoros	GW0140	winter	1			1		1	150.5	150.5	144.6	148.6	150.4	152.5	157	162.1	152
Intact	GW0158	winter	1			1		1	150.2	149	144.8	149.9	149.2	154.1	157.5	161.6	152
PR22R20	GW0181	winter	1			1		1	149.2	151.5	144.3	147.8	149.5	153.1	158	162.5	152
Mewa	GW0275	winter	1			1		1	150.1	148.5	144.4	149.9	150.8	152.5	157	162.4	152
Wydma	GW0288	winter	1			1		1	149.5	150	144.9	149.5	150.5	153.6	157	161	152
Altos	GW0005	winter	1			1		1	150.1	149	144.4	148.5	149.5	154.5	157	163.5	152.1
Manhattan	GW0055	winter	1			1		1	149	150.5	144.9	149.9	150.3	152.5	157.5	161.9	152.1
Ambrosia	GW0302	winter	1			1		1	149.1	152	146.1	146.4	147.8	152.7	159	163.5	152.1
Brilliant	GW0014	winter	1			1		1	149.3	151	144.8	149.8	150.7	153.2	157	162	152.2
Corsaire	GW0259	winter	1			1		1	148.6	152	146.3	147.3	150.3	153.2	158	162	152.2
Gulliver	GW0315	winter	1			1		1	147.8	151.5	145.1	148.3	150.5	152.9	158.6	163.1	152.2
Profilius	GW0381	winter	1			1		1	149.2	150	144.4	149.9	148.1	153.6	158.1	164	152.2
Philius	GW0294a	winter	1			1		1	150.1	151	145	149.3	149.3	154	157.5	161.5	152.2
Alidos	GW0004	winter	1			1		1	149.9	149.5	145.1	150.9	150.8	153.5	156.4	162.4	152.3
Batis	GW0010	winter	1			1		1	150.4	151	145.7	146.2	152.1	153.4	157.9	162	152.3
Musketeer	GW0324	winter	1			1		1	148.7	151	146	148.9	150.4	152.4	158.5	162.6	152.3
Dekan	GW0027	winter	1			1		1	149.9	152	144.9	149.3	149.9	153.2	158	162.4	152.4
Manager	GW0053	winter	1			1		1	148.8	151	146.7	150	149.7	153.7	157	161.9	152.4
Mirage	GW0060	winter	1			1		1	149.4	151	146	148	152.1	152.5	158.1	162	152.4
Rosario	GW0187	winter	1			1		1	149.1	151.5	146	148.1	149.6	153.7	158.5	162.9	152.4
Scorpion 25	GW0192	winter	1			1		1	149.3	152	145.5	149	150	152.9	158	162.9	152.4
Aperitiv	GW0291	winter	1			1		1	150.9	151	145	147.9	149.5	154	157	164	152.4
Solstice	GW0328	winter	1			1		1	149.7	150.5	144.6	148.3	150.9	153.3	157.5	164	152.4
Hussar	GW0345	winter	1			1		1	149	151	147.1	148.8	149.8	153	157.5	163.1	152.4
Attlass	GW0117	winter	1			1		1	150	149.5	145	150.5	150.4	154.3	157.1	163.5	152.5
Malacca	GW0320	winter	1			1		1	149.2	152	146.4	149.4	150.1	152.5	158	162.5	152.5
Magnus	GW0052	winter	1			1		1	148.5	151	145.5	149.7	152.6	154	157.1	162.1	152.6
Tarso	GW0086	winter	1			1		1	150.9	150	145	149.4	151.3	154.4	157.5	161.9	152.6
Transit	GW0090	winter	1			1		1	150.5	150.5	144.8	149	152.5	153.2	157.5	162.5	152.6
Nateja	GW0279	winter	1			1		1	150.4	152	146	149.4	150.6	153.6	157.5	161.4	152.6
Battalion	GW0303	winter	1			1		1	148.2	153.5	147.1	148.9	150	152.8	157.5	162.7	152.6
Limes	GW0048	winter	1			1		1	148.8	153.5	145	148.4	152.9	152.2	158.5	162.4	152.7
Milvus	GW0059	winter	1			1		1	149.6	151.5	145.1	148.7	151.6	154.1	158	162.6	152.7
Kleber	GW0161	winter	1			1		1	149.8	150.5	146	149	151.2	153.1	159	163	152.7
Istabraq	GW0318	winter	1			1		1	149.5	151.5	145	149.8	151.9	153	158	162.6	152.7
Limerick	GW0319	winter	1			1		1	149.6	153.5	145.7	150	150.4	153.4	157.4	161.7	152.7
Hanseat	GW0342	winter	1			1		1	149.5	152.5	145.4	147.1	152	153	159	163.1	152.7
Bussard	GW0015	winter	1			1		1	148.5	151	145.9	149.4	151.3	155.6	157.4	163	152.8
Haldor	GW0038	winter	1			1		1	150.3	151	145.5	150.7	150.6	153.7	157	163.5	152.8
Paroli	GW0067	winter	1			1		1	150.6	150	145.4	149.1	153.6	152.6	158.1	162.6	152.8
Toronto	GW0089	winter	1			1		1	148.7	150.5	145.5	151.6	150.1	155.6	157.5	162.5	152.8
Paledor	GW0177	winter		1		1		1	150.2	151	145.1	149.4	151	154.5	157.5	164.1	152.8
Lars	GW0293	winter	1			1		1	151	151	146	147.7	152	153.4	157.5	163.6	152.8
Monty	GW0323	winter	1			1		1	148.9	151.5	148	148.3	149.6	153.8	159	163	152.8
Travix	GW0358	winter	1			1		1	151.4	151	145	148.5	150.3	153.1	159	164	152.8
Potenzial	GW0070	winter	1			1		1	150.1	151.5	146	149.3	150	154.1	158	164	152.9
Striker	GW0083	winter	1			1		1	151.2	150	145.1	149.9	151.5	153.8	157.9	163.5	152.9
Baltimor	GW0125	winter	1			1		1	149	151.5	146	150	151.9	154.1	158	163	152.9
Brando	GW0128	winter	1			1		1	150.2	152	145.9	149.7	149.4	153.9	158.5	163.9	152.9
Legenda	GW0273	winter	1			1		1	150.5	151	146	150.5	151.4	153.1	157.5	162.9	152.9
Nutka	GW0280	winter	1			1		1	150.8	152	146	149.9	150.2	153.1	159	162.5	152.9
Herzog	GW0344	winter	1			1		1	149.3	150	145.5	150.1	151.7	153.9	157.5	164.9	152.9
Certo	GW0022	winter	1			1		1	149.8	151	144.6	150.1	152.7	154.1	158.5	163	153
Maverick	GW0056	winter	1			1		1	149.6	151	146.6	149.6	152.1	153.8	158.5	163.1	153
Equinox	GW0143	winter	1			1		1	149.7	152	146	149.6	151	154.1	158.1	163.5	153
Hourra	GW0153	winter	1			1		1	150.1	151	146	150.9	151.2	154	158	162.9	153
Zanatan	GW0243	winter	1			1		1	150.5	150.5	146	149.1	153	153.2	159	162.6	153
Ostka Strzelecka	GW0281	winter	1			1		1	149.9	150.5	146.2	150.7	151.7	154.1	158	162.9	153
Zebedee	GW0332	winter	1			1		1	149.4	153.5	145.5	149.2	150.7	153.7	159.9	162.4	153
Orestis	GW0350	winter	1			1		1	149.8	151.5	145.5	150.2	152.6	153.8	157.5	163.1	153
Monopol	GW0061	winter	1			1		1	151.3	152	145.7	149.8	151	154.6	157	163.4	153.1
Sokrates	GW0081	winter	1			1		1	150.9	151.5	146.4	150	150.9	155	158.4	162.1	153.1
Bill	GW0228	winter	1			1		1	149.7	151.5	147.9	149.2	151.4	154.2	158.6	162.6	153.1
Pamier	GW0383	winter	1			1		1	149.9	151.5	146.6	149.6	151.7	153.4	159.1	163	153.1
Elegant	GW0030	winter	1			1		1	149.3	152	146.5	149.7	152.4	154.2	159	162.5	153.2
Fedor	GW0034	winter	1			1		1	151.2	151	145.6	150.6	152	155	158	162	153.2
Kranich	GW0046	winter	1			1		1	149.1	153.5	147.2	149.7	151.1	154	158	163.3	153.2
Leiffer	GW0047	winter	1			1		1	151.4	151	145	150.6	152	154.7	156.9	163.6	153.2
Naturastar	GW0064	winter	1			1		1	151.2	152.5	145.5	149.8	152.2	153.4	158.5	162.5	153.2
Haussmann	GW0152	winter	1			1		1	149.6	153.5	146.6	151.1	150.4	153.3	158	162.7	153.2
Kobiera	GW0270	winter	1			1		1	152.9	152	145.5	149	152.8	153.2	157.9	162.5	153.2
Claire	GW0305	winter	1			1		1	150.9	152	146.2	149.3	152.4	153.9	158.5	162.5	153.2
Flair	GW0035	winter	1			1		1	152	151	145.9	151.1	151.9	154.3	157.5	163	153.3
Inspiration	GW0042	winter	1			1		1	149.4	151.5	145.4	151.1	153.1	154.5	158.5	162.9	153.3
Eurojet	GW0250	winter	1			1		1	151.1	151.5	146.1	151	151.9	154	157	163.5	153.3
Brompton	GW0304	winter	1			1		1	150.9	153.5	146.9	149.4	150.9	153.2	158.9	162.5	153.3
Drifter	GW0029	winter	1			1		1	151	152	145.7	150.9	152.7	154.3	158	162.8	153.4
Tambor	GW0085	winter	1			1		1	150.2	151.5	145.2	151.3	150.6	155.2	158	164.9	153.4
Velocity	GW0330	winter	1			1		1	150	154	147.4	149.8	150.4	153.6	158	164	153.4
Meteor	GW0057	winter	1			1		1	149.5	153	145.5	151.7	151.9	155.1	158.5	162.5	153.5
Cliff	GW0098	winter	1			1		1	150.3	153.5	145.6	148.9	152.3	153.8	159.5	164.3	153.5
Solist	GW0238	winter	1			1		1	151.1	153.5	145.9	150.4	152.2	153.9	158	163.1	153.5
Hyperion	GW0317	winter	1			1		1	151.1	152.5	145.9	149	153.2	153.9	158.4	164.1	153.5
Kanzler	GW0347	winter	1			1		1	150.1	152	146.4	150.8	154.6	153.8	157.5	163.1	153.5
Anthus	GW0006	winter	1			1		1	151.2	152	146.6	150.5	152.1	154.8	157.5	164	153.6
Boomer	GW0012	winter	1			1		1	151.4	153	146.3	150.7	150.1	154.6	158.6	164.4	153.6
Petrus	GW0068	winter	1			1		1	151.9	151	145.7	151	152.1	155.1	158.5	163.6	153.6
Seyrac	GW0194	winter	1			1		1	150.9	154	145.9	148.7	152.9	153.3	159.4	163.5	153.6
Zawisza	GW0289	winter	1			1		1	149.9	151.5	147.4	151.4	153.2	154.1	157.5	163.5	153.6
Deben	GW0309	winter	1			1		1	151.5	152.5	146	150.5	152.3	153.6	159	163.6	153.6
Biscay	GW0011	winter	1			1		1	150.3	152	146.9	150.7	153.6	153.8	158.5	164	153.7
Tommi	GW0087	winter	1			1		1	151.3	154	146.4	151.4	150.9	154.1	159	162.5	153.7
Tower	GW0263	winter	1			1		1	149.9	153.5	147.5	149.8	151.9	154.8	157.4	164.5	153.7
SW Hurtig	GW0299	winter	1			1		1	150.9	151.5	147.9	151.4	151.7	154	158	164	153.7
Robigus	GW0326	winter	1			1		1	149.8	152	147.5	149.9	151.8	155.6	158.5	164.5	153.7
Xi19.	GW0331	winter	1			1		1	150.8	154.5	146.3	150.2	152.3	154.2	159	162.1	153.7
Privileg	GW0071	winter	1			1		1	151.2	150.5	147	151.1	151.7	155.2	158.5	165.6	153.8
Skalmeje	GW0078	winter	1			1		1	151.6	154	146.5	150.4	152.3	153.9	158.5	163	153.8
Viscount CPBT W 136	GW0361	winter	1			1		1	150.8	153	146.1	150.9	152.6	154.3	159	164	153.8
Compliment	GW0024	winter	1			1		1	150.7	151	146.5	151.9	154.9	155.4	157.5	163	153.9
Hermann	GW0039	winter	1			1		1	151	152.5	147.4	149.7	153.2	154.6	158	164.6	153.9
Romanus	GW0075	winter	1			1		1	151.2	152.5	146.1	151.5	151.7	155.7	158.4	163.9	153.9
Raison	GW0185	winter	1			1		1	149.7	155	147.4	149.8	153.5	154.1	159.5	161.9	153.9
Samurai	GW0190	winter	1			1		1	150.8	153	146.9	150.1	153.5	154.6	159.5	163	153.9
Borneo	GW0013	winter	1			1		1	151.6	153.5	147.5	149.4	152.3	155.3	158.6	164	154
Centrum	GW0021	winter	1			1		1	150.1	151.5	147.2	151.3	154.8	154.7	158	164	154
Türkis	GW0094	winter	1			1		1	150.2	151	146.6	152.8	153.5	155.7	158	164.5	154
Zyta	GW0290	winter	1			1		1	149.8	152.5	148.2	151.8	152.1	155.4	158	164	154
Oakley	GW0325	winter	1			1		1	150.9	152	146.7	150.8	153.5	154.4	160.1	164	154
CPBT W130	GW0308	winter	1			1		1	151.3	153.5	147.4	150.6	151.9	153.9	159.5	164.4	154.1
Versailles	GW0202	winter	1			1		1	150.7	153	146.7	150.7	154	154.7	159.6	164	154.2
Symbol	GW0239	winter	1			1		1	150.6	154	147.5	151.1	154.1	154.5	158.5	163.1	154.2
Achat	GW0244	winter	1			1		1	150.1	152.5	147.5	153	154.3	155.4	158.5	162.5	154.2
Vitus	GW0254	winter	1			1		1	150.7	153	147.9	150.8	154.9	154.4	158.5	163.8	154.2
Sobi	GW0080	winter	1			1		1	164.2	150	145	150.8	151.7	153.6	157.4	162	154.3
LOCH 3754 Adlon	GW0107	winter	1			1		1	150	153.5	147	150.9	152.1	155.8	159.5	165.5	154.3
Grisby	GW0150	winter	1			1		1	151.1	154	148.1	151.7	149.9	155.3	159.6	164.5	154.3
Ordeal	GW0172	winter	1			1		1	150.3	155	146.6	150.7	153.1	154.2	160.1	164.5	154.3
Hereford	GW0233	winter	1			1		1	152.2	153	147.9	150.9	153.3	154.1	158	164.9	154.3
Smuggler	GW0237	winter	1			1		1	152.8	154	147.3	150.8	152.7	154.1	157.9	164.5	154.3
Tonacja	GW0287	winter	1			1		1	150.3	152	148	151.1	153.3	157.4	158.5	164.1	154.3
Duxford	GW0310	winter	1			1		1	152.9	154	147.1	150.5	151.1	155.3	159	164.5	154.3
Hereward	GW0234	winter	1			1		1	152	154	148.2	150.4	153.5	154.4	158.5	164.5	154.4
Savannah	GW0355	winter	1			1		1	151.4	152.5	148.2	150.1	153.3	155	159.5	164.9	154.4
Atlantis	GW0009	winter	1			1		1	153.2	150.5	146.9	152.8	154.9	157.6	158.1	162	154.5
Jenga	GW0043	winter	1			1		1	152.5	154	147.6	151.1	152.3	155.2	159	164.1	154.5
Tuareg	GW0091	winter	1			1		1	152.8	153.5	147.7	151	153.6	154.7	159	164.1	154.5
Julius	GW0103	winter	1			1		1	152.1	153.5	145.9	151.8	153.9	155.5	159.6	163.9	154.5
Carenius	GW0020	winter	1		n. d.	n. d.		1	151.5	154.5	148.8	150.5	152.7	155.1	159.5	164	154.6
Toras	GW0088	winter	1			1		1	152.7	152.5	147.5	151.7	153.3	156.4	158	164.6	154.6
Fastnet	GW0231	winter	1			1		1	152.1	155	147.3	150	154.3	154.4	160	163.5	154.6
Vivant	GW0335	winter	1			1		1	151.3	153	147.4	151.1	154	156	159	165	154.6
Actros	GW0001	winter	1			1		1	152.4	154	147.8	151.2	153.3	155.5	158.5	164.9	154.7
Ellvis	GW0031	winter	1			1		1	150.8	152.5	148.7	152	154.5	156.4	159	164	154.7
Magister	GW0051	winter	1			1		1	152.6	154	147.5	151.8	153.9	155.6	158	164	154.7
Tulsa	GW0093	winter	1			1		1	151.4	153	148.4	152.2	152.5	155.9	159	164.9	154.7
Esket	GW0033	winter	1			1		1	152.1	152.5	148.1	152.2	152.7	157.2	158.1	165.6	154.8
Astron	GW0008	winter	1			1		1	152.4	153	147.5	152	154.4	156.3	159	164.6	154.9
Campari	GW0017	winter	1			1		1	151.4	154	147.9	151.5	153.1	155.2	160.5	165.4	154.9
Discus	GW0028	winter	1		1			1	152.5	153	148	151.7	153.6	158.2	158	164.4	154.9
Frument	GW0232	winter	1			1		1	151.4	154	148.1	151.9	153.3	156	160	164.6	154.9
Welford	GW0333	winter	1			1		1	151.4	154.5	147.5	151	154.8	155.6	160	164.5	154.9
Lynx	GW0348	winter	1			1		1	152.2	154.5	149.2	150.6	154	154.5	160	164.1	154.9
Akteur	GW0003	winter	1			1		1	153.7	152.5	147.8	152.4	154.3	156.2	159.5	165	155.2
Heroldo	GW0040	winter	1			1		1	151.8	153	149.2	151.6	154.5	155.7	160	165.6	155.2
Retro	GW0073	winter	1			1		1	151.3	152.5	146.9	153.3	156	157.8	158.5	164.9	155.2
Zobel	GW0097	winter	1			1		1	152.3	152.5	149.5	152.1	154.6	157.1	158.5	165	155.2
Torkil	GW0240	winter	1			1		1	151.3	154	149.1	151.9	153.7	155.7	160	165.5	155.2
Tabasco	GW0382	winter	1			1		1	151.5	154	149.7	151.5	154.4	156.1	159.5	165	155.2
Ritmo	GW0074	winter	1			1		1	151.6	153.5	149.4	151.8	154.9	156.7	160	164.5	155.3
Cassiopeia	GW0229	winter	1			1		1	152.9	155	148.5	152	154.6	155.2	159.5	164.6	155.3
Rywalka	GW0282	winter	1			1		1	152.5	154	150.8	151.2	154.4	155.8	159.6	164	155.3
Lucius	GW0049	winter	1			1		1	152.2	153	148.6	152.4	155.4	157.2	159.6	165	155.4
Urban	GW0359	winter	1			1		1	151.4	153.5	148.4	152.7	154.4	157.5	159	166	155.4
Trintella	GW0241	winter	1		n. d.	n. d.		1	150.9	154.5	151.1	152.1	154.6	156.4	159.9	164.6	155.5
Estica	GW0260	winter	1			1		1	152.3	154	148.4	152.1	154.6	157.6	159	166	155.5
Korweta	GW0272	winter	1			1		1	153.6	153	149.5	153.7	154.4	156	159	165.4	155.6
Prinz	GW0351	winter	1			1		1	152.5	155.5	149.5	152	154.1	156.2	160	164.6	155.6
Opus	GW0066	winter	1			1		1	152.2	153.5	149.4	152.2	155.4	157.4	160	165.6	155.7
Skagen	GW0077	winter	1			1		1	152.5	153.5	150.3	151.9	155.6	157.5	159	165.5	155.7
Andi	GW0225	winter	1			1		1	153.7	154.5	150.7	152.6	154.2	156.2	159.5	164.4	155.7
Contur	GW0230	winter	1			1		1	152.5	154	149.4	152.6	154.6	157	160.5	165	155.7
Zentos	GW0096	winter	1			1		1	152.5	153	148.4	152.9	156.1	159.1	158	166.5	155.8
History	GW0101	winter	1			1		1	154.2	154	148.7	153.5	153.7	157.5	160	164.4	155.8
Senat	GW0236	winter	1			1		1	152.7	154	150.5	153.6	153.3	157.5	160	164.5	155.8
Consort	GW0306	winter	1			1		1	153.5	155	149.6	152	154.6	157.4	159	165.5	155.8
Exsept	GW0341	winter	1			1		1	151.2	156	152	152	155.1	155.6	160.4	165	155.9
Mandub	GW0054	winter	1			1		1	152.2	154	151.3	153.4	154.9	157.4	160	164.5	156
Piko	GW0069	winter	1			1		1	152.9	155.5	152.6	152	154.5	155.7	159.5	165.9	156.1
SW Skotte	GW0300	winter	1			1		1	153.1	154.5	151.5	152.5	154.5	157.9	160.1	165.6	156.2
Slejpner	GW0356	winter	1			1		1	151.9	155	149.9	152.8	156	158.1	161	165.5	156.3
Alchemy	GW0301	winter	1			1		1	153.9	155.5	150.4	152.5	155	157.2	161	166	156.4
Format	GW0036	winter	1			1		1	153.3	155.5	150	153.3	157.3	157.4	160.5	165.4	156.6
Dream	GW0099	winter	1			1		1	154.5	154	150.6	152.7	156.7	158.1	161	165.1	156.6
Marshal	GW0294	winter	1			1		1	153.9	154.5	151.8	153.2	155.4	157.4	161	166	156.6
Haven	GW0343	winter	1			1		1	154.3	155.5	150.9	152.9	155.2	157.6	160.5	166	156.6
Solitär	GW0082	winter	1			1		1	153.6	155	152.5	153.7	155.4	158.2	160	165	156.7
Gatsby	GW0312	winter	1			1		1	154.2	154.5	151.4	153.2	155.1	158.5	160.5	166.4	156.7
Jafet	GW0380	winter	1			1		1	154.5	155.5	151.4	153.2	156	156.5	160.5	166	156.7
Olivin	GW0065	winter	1			1		1	152.8	156	151.9	153.6	156.5	158.7	159.5	165.5	156.8
SW Harnesk	GW0297	winter	1			1		1	154.4	155	152	154.4	156.6	158	160.9	165.5	157.1
Fregata	GW0268	winter	1			1		1	155.5	156	152.6	154.3	156.4	157.3	160.5	166.1	157.3
Sukces	GW0286	winter	1			1		1	155	156.5	153	154	155.6	158.4	161.1	165.6	157.4
Kosack	GW0292	winter	1			1		1	160.6	158	155	152.6	155.1	156.1	161.5	165	158
Stava	GW0295	winter	1			1		1	156	158	154.8	157.3	161.1	159.6	163	166.6	159.6
n. d. = not detected
